# Supplementary material for: Vaginal lactobacilli inhibit growth and hyphae formation of Candida albicans
Source: PubMed Central journal article supplement (PMC6544633; doi:10.1038/s41598-019-44579-4), 2019-05-31
Supplement: 41598_2019_44579_MOESM1_ESM.pdf [file 41598_2019_44579_MOESM1_ESM.pdf]

1 **Vaginal lactobacilli inhibit growth and hyphae formation of**  
2 ***Candida albicans***

3 Sung Jae Jang<sup>1,6</sup>, Kyeongju Lee<sup>1,6</sup>, Bomi Kwon<sup>1</sup>, Hyun Ju You<sup>1,2,\*</sup> and GwangPyo Ko<sup>1,3,4,5,\*</sup>

4 <sup>1</sup>Department of Environmental Health Sciences, Graduate School of Public Health, Seoul  
5 National University, Seoul, Republic of Korea

6 <sup>2</sup>Institute of Health and Environment, Seoul National University, Seoul, Republic of Korea

7 <sup>3</sup>KoBioLabs, Inc., Seoul, Republic of Korea

8 <sup>4</sup>Bio-MAX/N-Bio, Seoul National University, Seoul, Republic of Korea

9 <sup>5</sup>Center for Human and Environmental Microbiome, Institute of Health and Environment,  
10 Seoul National University, Seoul, Republic of Korea

11 <sup>6</sup>Both authors equally contributed to this work as co-1st authors.

12 **Correspondence:**

13 GwangPyo Ko, Ph.D., gko@snu.ac.kr

14 Hyun Ju You, Ph.D., dhlover1@snu.ac.kr

15

16

17

18

19

20

21

22 **Supplementary Tables**

23 Table S1. Primers used for qPCR analysis

| Gene                       | Sequence                 |
|----------------------------|--------------------------|
| <i>ACT1-F</i> <sup>a</sup> | TCAGACCAGCTGATTTAGGTTTG  |
| <i>ACT1-R</i> <sup>b</sup> | GTGAACAATGGATGGACCAG     |
| <i>ALS3-R</i>              | CCTGAAATTGACATGTAGCA     |
| <i>ALS3-F</i>              | CTAATGCTGCTACGTATAATT    |
| <i>ECE1-F</i>              | GCTGGTATCATTGCTGATAT     |
| <i>ECE1-R</i>              | TTCGATGGATTGTTGAACAC     |
| <i>HWPI-F</i>              | TGGTGCTATTACTATTCCGG     |
| <i>HWPI-R</i>              | CAATAATAGCAGCACCGAAG     |
| <i>SAP5-F</i>              | CAGAATTTCCCGTCGATGAGA    |
| <i>SAP5-R</i>              | CATTGTGCAAAGTAACTGCAACAG |

24

25 <sup>a</sup>F represents a forward primer

26 <sup>b</sup>R represents a reverse primer

27

28

29

30

31

32

Table S2. Lactobacillus strains isolated from vaginal specimens of healthy women

| No. | Species             | Strains | Source | Confirmed_ID                                                                             |
|-----|---------------------|---------|--------|------------------------------------------------------------------------------------------|
| 1   | <i>L. crispatus</i> | 152     | Twin 1 | Lactobacillus crispatus strain G10 16S ribosomal RNA gene, partial sequence              |
| 2   | <i>L. crispatus</i> | 210     | Mother | Lactobacillus crispatus strain G10 16S ribosomal RNA gene, partial sequence              |
| 3   | <i>L. crispatus</i> | 219     | Mother | Lactobacillus crispatus ST1 complete genome, strain ST1                                  |
| 4   | <i>L. crispatus</i> | 220     | Mother | Lactobacillus crispatus strain A014 16S ribosomal RNA gene, partial sequence             |
| 5   | <i>L. crispatus</i> | 227     | Twin 1 | Lactobacillus crispatus strain G10 16S ribosomal RNA gene, partial sequence              |
| 6   | <i>L. crispatus</i> | 236     | Twin 1 | Lactobacillus crispatus strain G10 16S ribosomal RNA gene, partial sequence              |
| 7   | <i>L. crispatus</i> | 241     | Twin 1 | Lactobacillus crispatus strain G10 16S ribosomal RNA gene, partial sequence              |
| 8   | <i>L. crispatus</i> | 250     | Twin 1 | Lactobacillus crispatus strain G10 16S ribosomal RNA gene, partial sequence              |
| 9   | <i>L. crispatus</i> | 253     | Twin 1 | Lactobacillus crispatus strain G10 16S ribosomal RNA gene, partial sequence              |
| 10  | <i>L. crispatus</i> | 282     | Twin 2 | Lactobacillus crispatus strain A014 16S ribosomal RNA gene, partial sequence             |
| 11  | <i>L. crispatus</i> | 358     | Twin 2 | Lactobacillus crispatus strain A014 16S ribosomal RNA gene, partial sequence             |
| 12  | <i>L. crispatus</i> | 367     | Twin 1 | Lactobacillus crispatus ST1 strain ST1 16S ribosomal RNA, complete sequence              |
| 13  | <i>L. crispatus</i> | 381     | Mother | Lactobacillus crispatus strain G4 16S ribosomal RNA gene, partial sequence               |
| 14  | <i>L. crispatus</i> | 385     | Mother | Lactobacillus crispatus strain G10 16S ribosomal RNA gene, partial sequence              |
| 15  | <i>L. crispatus</i> | 476     | Twin 1 | Lactobacillus crispatus ST1 strain ST1 16S ribosomal RNA, complete sequence              |
| 16  | <i>L. fermentum</i> | 155     | Twin 1 | Lactobacillus fermentum strain IMAU32493 16S ribosomal RNA gene, partial sequence        |
| 17  | <i>L. fermentum</i> | 157     | Twin 1 | Lactobacillus fermentum strain TY5 16S ribosomal RNA gene, partial sequence              |
| 18  | <i>L. fermentum</i> | 168     | Twin 1 | Lactobacillus fermentum gene for 16S ribosomal RNA, partial sequence, strain: YS2        |
| 19  | <i>L. fermentum</i> | 175     | Twin 1 | Lactobacillus fermentum strain A045 16S ribosomal RNA gene, partial sequence             |
| 20  | <i>L. fermentum</i> | 240     | Twin 1 | Lactobacillus fermentum strain TY5 16S ribosomal RNA gene, partial sequence              |
| 21  | <i>L. fermentum</i> | 245     | Twin 1 | Lactobacillus fermentum strain A045 16S ribosomal RNA gene, partial sequence             |
| 22  | <i>L. fermentum</i> | 257     | Twin 1 | Lactobacillus fermentum strain A045 16S ribosomal RNA gene, partial sequence             |
| 23  | <i>L. fermentum</i> | 258     | Twin 1 | Lactobacillus fermentum strain A045 16S ribosomal RNA gene, partial sequence             |
| 24  | <i>L. fermentum</i> | 259     | Twin 1 | Lactobacillus fermentum strain L4 16S ribosomal RNA gene, partial sequence               |
| 25  | <i>L. fermentum</i> | 264     | Twin 1 | Lactobacillus fermentum strain CMUL54 16S ribosomal RNA gene, partial sequence           |
| 26  | <i>L. fermentum</i> | 374     | Twin 1 | Lactobacillus fermentum gene for 16S ribosomal RNA, partial sequence, strain: S107D      |
| 27  | <i>L. fermentum</i> | 430     | Twin 1 | Lactobacillus fermentum gene for 16S ribosomal RNA, partial sequence, strain: YS2        |
| 28  | <i>L. fermentum</i> | 444     | Twin 1 | Lactobacillus fermentum strain BCS30 16S ribosomal RNA gene, partial sequence            |
| 29  | <i>L. gasseri</i>   | 159     | Twin 1 | Lactobacillus gasseri strain BLB1b 16S ribosomal RNA gene, partial sequence              |
| 30  | <i>L. gasseri</i>   | 281     | Twin 2 | Lactobacillus jensenii strain A084 16S ribosomal RNA gene, partial sequence              |
| 31  | <i>L. gasseri</i>   | 431     | Twin 1 | Lactobacillus gasseri strain BLB1b 16S ribosomal RNA gene, partial sequence              |
| 32  | <i>L. gasseri</i>   | 457     | Twin 2 | Lactobacillus gasseri strain VEL 16S ribosomal RNA gene, partial sequence                |
| 33  | <i>L. gasseri</i>   | 462     | Twin 2 | Lactobacillus gasseri 16S ribosomal RNA gene, partial sequence                           |
| 34  | <i>L. gasseri</i>   | 463     | Twin 2 | Lactobacillus gasseri strain BLB1b 16S ribosomal RNA gene, partial sequence              |
| 35  | <i>L. gasseri</i>   | 464     | Twin 2 | Lactobacillus gasseri strain BLB1b 16S ribosomal RNA gene, partial sequence              |
| 36  | <i>L. jensenii</i>  | 181     | Twin 2 | Lactobacillus jensenii strain A084 16S ribosomal RNA gene, partial sequence              |
| 37  | <i>L. jensenii</i>  | 184     | Twin 2 | Lactobacillus jensenii strain A084 16S ribosomal RNA gene, partial sequence              |
| 38  | <i>L. jensenii</i>  | 185     | Twin 2 | Lactobacillus jensenii strain A084 16S ribosomal RNA gene, partial sequence              |
| 39  | <i>L. jensenii</i>  | 190     | Twin 2 | Lactobacillus jensenii strain G16 16S ribosomal RNA gene, partial sequence               |
| 40  | <i>L. jensenii</i>  | 200     | Twin 2 | Lactobacillus jensenii strain G16 16S ribosomal RNA gene, partial sequence               |
| 41  | <i>L. jensenii</i>  | 226     | Mother | Lactobacillus jensenii strain A084 16S ribosomal RNA gene, partial sequence              |
| 42  | <i>L. jensenii</i>  | 287     | Twin 2 | Lactobacillus jensenii strain A084 16S ribosomal RNA gene, partial sequence              |
| 43  | <i>L. jensenii</i>  | 290     | Twin 2 | Lactobacillus jensenii strain A084 16S ribosomal RNA gene, partial sequence              |
| 44  | <i>L. jensenii</i>  | 291     | Twin 2 | Lactobacillus jensenii strain A084 16S ribosomal RNA gene, partial sequence              |
| 45  | <i>L. jensenii</i>  | 354     | Twin 2 | Lactobacillus jensenii strain A084 16S ribosomal RNA gene, partial sequence              |
| 46  | <i>L. jensenii</i>  | 360     | Twin 2 | Lactobacillus jensenii strain A084 16S ribosomal RNA gene, partial sequence              |
| 47  | <i>L. jensenii</i>  | 448     | Twin 2 | Lactobacillus jensenii partial 16S rRNA gene, strain Gasser 62G                          |
| 48  | <i>L. jensenii</i>  | 465     | Twin 2 | Lactobacillus jensenii strain A084 16S ribosomal RNA gene, partial sequence              |
| 49  | <i>L. jensenii</i>  | 470     | Twin 2 | Lactobacillus jensenii strain A084 16S ribosomal RNA gene, partial sequence              |
| 50  | <i>L. jensenii</i>  | 478     | Twin 2 | Lactobacillus jensenii strain A084 16S ribosomal RNA gene, partial sequence              |
| 51  | <i>L. jensenii</i>  | 479     | Twin 2 | Lactobacillus jensenii strain G16 16S ribosomal RNA gene, partial sequence               |
| 52  | <i>L. spp.</i>      | 230     | Twin 1 | Uncultured Lactobacillales bacterium clone 4426 16S ribosomal RNA gene, partial sequence |
| 53  | <i>L. spp.</i>      | 362     | Twin 1 | Lactobacillus sp. JCM 1035 gene for 16S rRNA, partial sequence, strain: JCM 1035         |

34

35 Yellow, green and blue denote isolates obtained from T1, T2 and their mother, respectively

36

37

38

39 Table S3. Study subjects

| SampleID | Family | Stage_of_Menopause | Age(years) |
|----------|--------|--------------------|------------|
| R048     | F1     | Post-menopause     | 62         |
| R049     | F1     | Pre-menopause      | 41         |
| R050     | F1     | Pre-menopause      | 41         |
| R051     | F2     | Post-menopause     | 71         |
| R052     | F2     | Pre-menopause      | 44         |
| R053     | F2     | Pre-menopause      | 44         |
| R055     | F3     | Post-menopause     | 61         |
| R056     | F3     | Pre-menopause      | 39         |
| R057     | F3     | Pre-menopause      | 39         |

40

41

42

43

44

45

46

47

48

49

50

51

52

53 **Supplementary Figures**

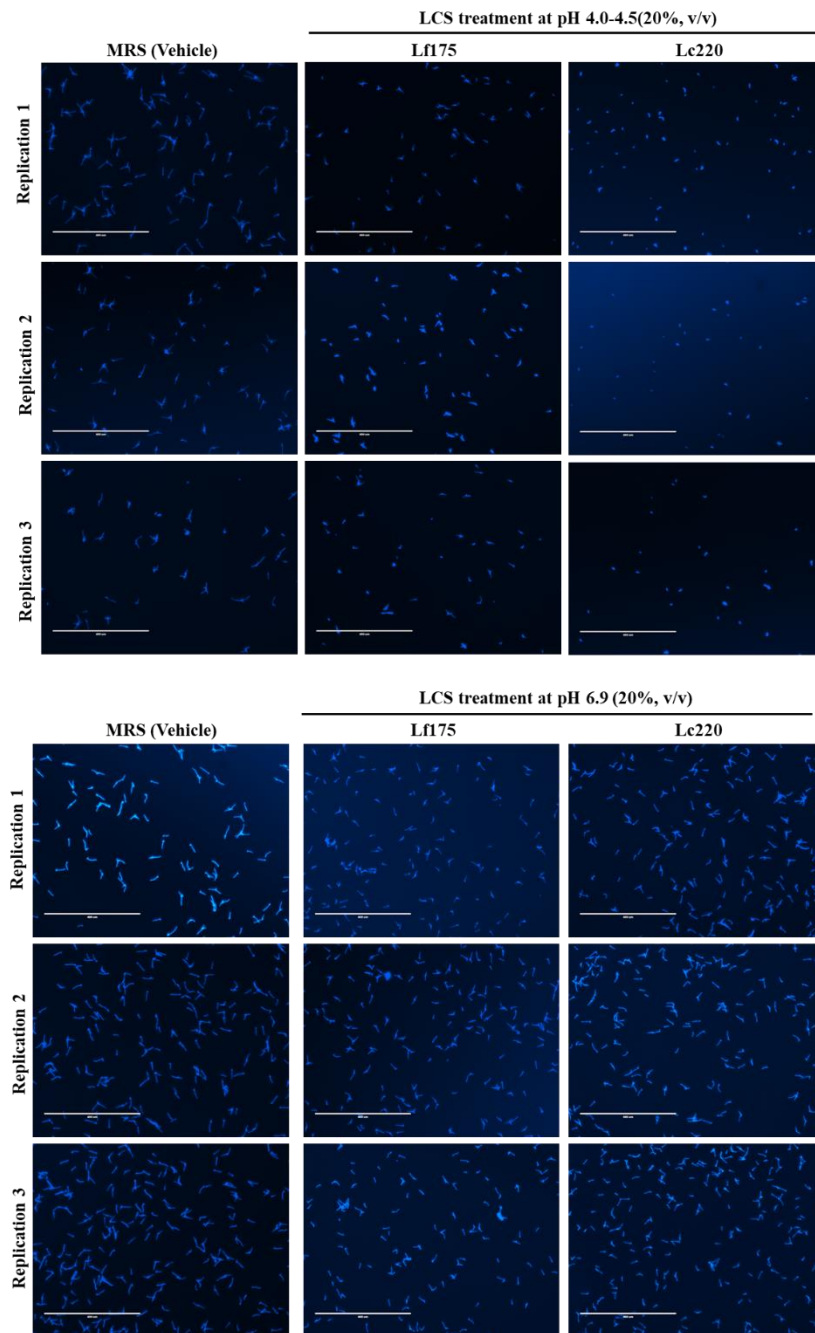

54

55 **Supplementary Figure S1. Effect of LCSs on *C. albicans* hyphal growth.** *C. albicans* was  
56 treated with LCSs at acidic (4.0–4.5) and neutral (6.9) pH. Hyphae were stained with  
57 Calcofluor white and examined under a fluorescence microscope. Scale bar: 200  $\mu$ m. Lf175  
58 and Lc220 represent *L. fermentum* SNUV175 and *L. crispatus* SNUV220, respectively.

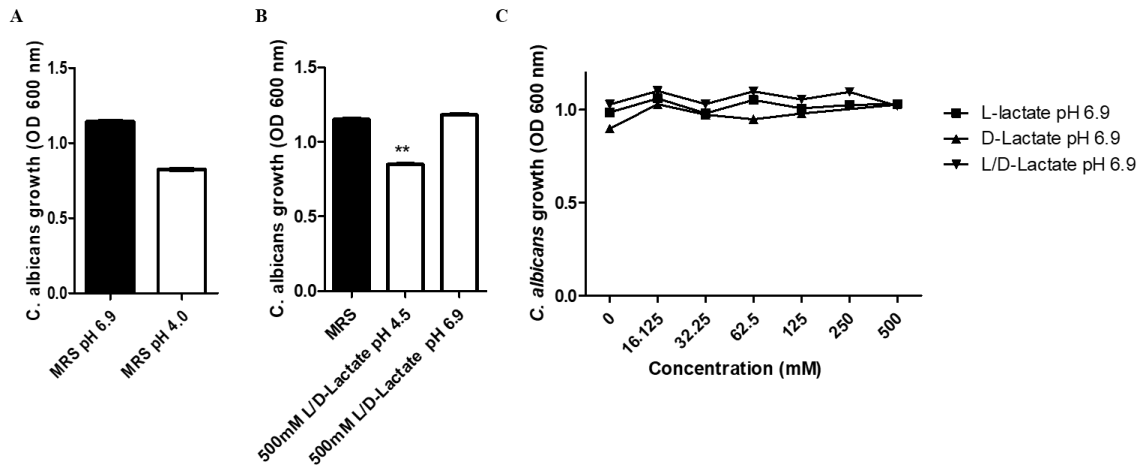

59

60 **Supplementary Figure S2. Effect of pH and lactate concentration on *C. albicans* growth.**

61 (A–B) Effects of pH (A) and lactate (B) on *C. albicans* growth (N=2). (C) Effects of various

62 concentrations of lactate isomers on *C. albicans* growth. Statistical significance was

63 calculated using the Mann-Whitney U test. \*\*,  $p < 0.001$ .

64

65

66

67

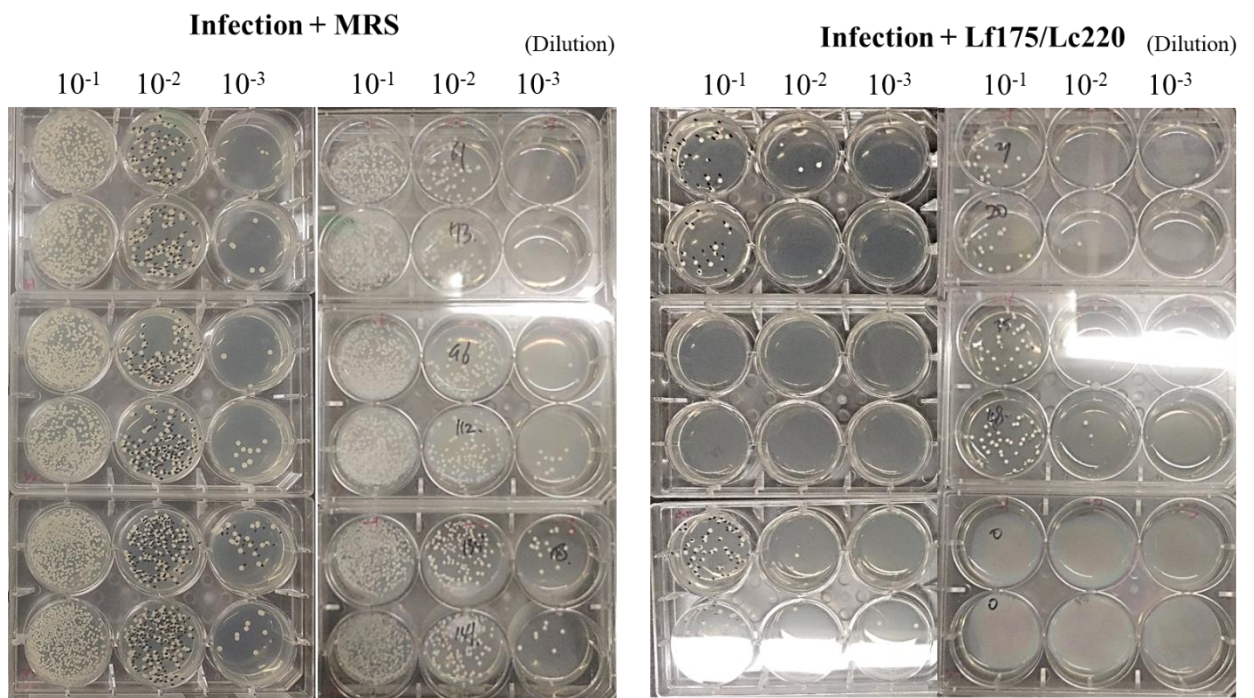

68

69

70 **Supplementary Figure S3. Effect of LCSs on vulvovaginal candidiasis.** Vaginal fluid was  
 71 harvested from *C. albicans*-infected mice treated with MRS or a mixture of LCSs from Lf175  
 72 and Lc220. Colony forming units (CFUs) were counted. Vaginal fluid was diluted with PBS.  
 73 Lf175 and Lc220 represent *L. fermentum* SNUV175 and *L. crispatus* SNUV220, respectively.

74
